1     **Structural connectivity gradient associated with a dichotomy reveals the topographic**  
2                                   **organization of the macaque insular cortex**

3     Long Cao <sup>1,2+</sup>, Zongchang Du <sup>3+</sup>, Yue Cui <sup>2,3,4+</sup>, Yuanchao Zhang <sup>1</sup>, Yuheng Lu <sup>2,3,4</sup>, Baogui  
4     Zhang <sup>2,4</sup>, Yanyan Liu <sup>2,4</sup>, Xiaoxiao Hou <sup>2,4</sup>, Xinyi Liu <sup>2,4</sup>, Luqi Cheng <sup>5</sup>, Kaixin Li <sup>6</sup>, Zhengyi  
5     Yang <sup>2,4</sup>, Lingzhong Fan <sup>2,3,4,7,8\*</sup>, Tianzi Jiang <sup>1,2,3,4,7,8\*</sup>

6     <sup>1</sup> Key Laboratory for NeuroInformation of Ministry of Education, School of Life Science and  
7     Technology, University of Electronic Science and Technology of China, Chengdu 610054,  
8     China

9     <sup>2</sup> Brainnetome Center, Institute of Automation, Chinese Academy of Sciences, Beijing 100190,  
10    China

11    <sup>3</sup> School of Artificial Intelligence, University of Chinese Academy of Sciences, Beijing 100049,  
12    China

13    <sup>4</sup> National Laboratory of Pattern Recognition, Institute of Automation, Chinese Academy of  
14    Sciences, Beijing 100190, China

15    <sup>5</sup> School of Life and Environmental Sciences, Guilin University of Electronic Technology,  
16    Guilin 541004, China

17    <sup>6</sup> School of Mechanical and Power Engineering, Harbin University of Science and Technology,  
18    Harbin 150080, China

19    <sup>7</sup> CAS Center for Excellence in Brain Science and Intelligence Technology, Institute of  
20    Automation, Chinese Academy of Sciences, Beijing 100190, China

21    <sup>8</sup> Research Center for Augmented Intelligence, Artificial Intelligence Research Institute,  
22    Zhejiang Laboratory, Hangzhou 311100, China

23

24    + These authors contributed equally to this work.

25

26    **\*Corresponding author:**

27    **Tianzi Jiang**, Brainnetome Center, Institute of Automation, Chinese Academy of Sciences,  
28    Beijing 100190, China. Email: [jiangtz@nlpr.ia.ac.cn](mailto:jiangtz@nlpr.ia.ac.cn)

29 **Lingzhong Fan**, Brainnetome Center, Institute of Automation, Chinese Academy of Sciences,  
30 Beijing 100190, China. Email: [lingzhong.fan@ia.ac.cn](mailto:lingzhong.fan@ia.ac.cn)

31

32 Correspondence should be addressed to Tianzi Jiang at [jiangtz@nlpr.ia.ac.cn](mailto:jiangtz@nlpr.ia.ac.cn)

33

34 **Abstract**

35 Histology studies revealed that the macaque insular cortex was characterized by the gradual  
36 organizations containing agranular, dysgranular and granular insula. However, no consensus  
37 has been reached on the elaborate subdivisions of macaque insula. Until now, no neuroimaging  
38 study to our knowledge combining connectivity-based gradients and parcellation has been  
39 performed to investigate the topographic organization of the macaque insular cortex. In this  
40 study, we used high-resolution ex vivo diffusion-weighted imaging data to explore the macaque  
41 insular cortex's global gradient organization and subdivisions. We found a rostrocaudal  
42 organization of the dominant gradient in the macaque insula using a diffusion map embedding.  
43 Meanwhile, extracting the 25% top and bottom components from the dominant and second  
44 gradient, which explained variance over 60% in total within ten gradients, the connectivity-  
45 based parcellation method was performed to subdivide each component into two subregions  
46 confirmed by the cross-validation analysis. Furthermore, permutations tests identified that two  
47 subregions from each component showed significant differences between their connectivity  
48 fingerprints. Finally, we found that the dominant and second gradients were significantly  
49 correlated with the T1w/T2w and cortical thickness maps in the macaque insula. Taken together,  
50 the global gradients combining the subdivisions examined the topographic organization of the  
51 macaque insular cortex based on the structural connectivity, which may contribute to a better  
52 understanding of the intricate insular cortex anatomy.

53

54 **Keywords:** Insular cortex; Rhesus monkey; Structural connectivity; Gradient; Parcellation

55 **Abbreviations**

|    |      |                                                     |
|----|------|-----------------------------------------------------|
| 56 | 6VR  | area 6 of cortex, ventral part, rostral subdivision |
| 57 | 8AV  | area 8 of cortex, anteroventral part                |
| 58 | 36R  | area 36, rostral part                               |
| 59 | Acb  | accumbens nucleus                                   |
| 60 | AK   | auditory koniocortex                                |
| 61 | Amyg | amygdaloid nucleus                                  |
| 62 | Gu   | gustatory cortex                                    |
| 63 | INS  | insular cortex                                      |
| 64 | IPL  | Inferior parietal lobule                            |
| 65 | MST  | medial superior temporal area                       |
| 66 | PaA  | paraauditory area                                   |
| 67 | PaI  | parainsular cortex                                  |
| 68 | Pd   | pallidus                                            |
| 69 | PE   | parietal area PE                                    |
| 70 | Pir  | piriform cortex                                     |
| 71 | PPt  | posterior parietal area                             |
| 72 | ProK | prokoniocortex                                      |
| 73 | ProM | promotor                                            |
| 74 | ReI  | retroinsular area                                   |
| 75 | ROI  | region of interest                                  |
| 76 | S2   | secondary somatosensory cortex                      |
| 77 | Str  | striatum                                            |
| 78 | STS  | superior temporal sulcus                            |
| 79 | Tha  | thalamus                                            |
| 80 | TP   | temporopolar area                                   |
| 81 | TPt  | temporoparietal cortex                              |

## 82 **1. Introduction**

83 Macaque insular cortex, located in the depth of the Sylvian fissure, is structurally and  
84 functionally heterogeneous cortical region characterized by the cytoarchitectonic gradients and  
85 extensive anatomical connections with the limbic system, prefrontal, orbitofrontal, parietal and  
86 temporal lobe. Macaque insula has been demonstrated to be involved in diverse functions, such  
87 as emotions, social behavior ([Caruana et al. 2011](#)), execution ([Di Cesare et al. 2019](#)), reward  
88 ([Mizuhiki et al. 2012](#)) and also auditory ([Remedios et al. 2009](#)), gustatory ([Yaxley et al. 1990](#)),  
89 sensorimotor, orofacial motor ([Jezzini et al. 2012](#)), etc. A unique characteristic of the insula is  
90 the presence of von Economo neuron (VEN), which is associated with self-awareness and  
91 social cognition, and was originally observed only in the great ape and humans, but not other  
92 primates. However, a recent architectonic study demonstrated that the VENs also existed in the  
93 anterior insula of the macaque ([Evrard et al. 2012](#)), suggesting that the insula of macaque  
94 monkeys plays a critical role in evolutionary and comparative neuroscience ([Evrard 2019](#)).

95 Structural organization of macaque insula is primarily obtained from cyto-, or myelo-, and  
96 receptor- architectonic studies. Using Nissl and myelin staining, Mesulam and Mufson  
97 proposed the concept of granularity and subdivided macaque insula into three architectonic  
98 areas, including agranular, dysgranular and granular insula (Ia, Id and Ig), which were just  
99 delineated by the circular sulcus and limen insulae ([Mesulam and Mufson 1982](#)). Subsequently,  
100 Carmichael and Price used multiple stains to subdivide macaque orbital and medial prefrontal  
101 cortex and found that the anterior insula subregion Ia was extended onto the posterior orbital  
102 surface and could be subdivided into five subregions, including medial, intermediate, lateral,  
103 posteromedial and posterolateral insula (Iam, Iai, Ial, Iapm and Iapl) ([Carmichael and Price  
104 1994a](#)). Recently, using multiple immunohistochemical stains, Gallay et al. revealed that  
105 macaque insula could be into eight subregions (Ia1-2, Id1-3, Ig1-2 and G) with parallel ventral  
106 to dorsal gradients by the cytoarchitectonic features of layer II-V ([Gallay et al. 2012a](#)). After  
107 confirming the VENs in the Ia of macaque insula, Evrard et al. employed Nissl and Myelin  
108 techniques to subdivide macaque insular cortex into fifteen subregions ([Evrard et al. 2014](#)),  
109 which showed medial-lateral or ventrodorsal pattern along the rostrocaudal axis of macaque  
110 insula territory. Therefore, microstructural evidence has demonstrated that the macaque insular

111 cortex displays anterior-middle-posterior divisional patterns at a coarse level. In contrast, the  
112 highly specialized subregions of macaque insula remain not well-established.

113       Following the development of neuroimaging techniques, accumulating studies have  
114 focused on the organization of the human insular cortex. Initially, most neuroimaging studies  
115 performed connectivity-based methods to parcellate human insula with clear boundaries.  
116 However, recent neuroimaging research revealed that human insula represented global  
117 gradients in macroscopic and microscopic organizations. For example, based on probabilistic  
118 tractography, Cerliani et al. utilized Laplacian eigenmaps to explore the organization of human  
119 insula, and unveiled the rostrocaudal gradients of structural connectivity (SC) variation across  
120 the insula territory (Cerliani et al. 2012b). More recently, in one fMRI study, Tian et al. revealed  
121 that human insula could be characterized as a continuum of gradual change along the  
122 rostrocaudal axis and parcellated human insula into two subregions with anterior-posterior  
123 pattern (Tian and Zalesky 2018). Using multi-shell diffusion-weighted imaging (DWI), Menon  
124 et al. used RTOP representing granularity to investigate the microstructure of the human insular  
125 cortex and found gradients along the anterior-posterior and dorsal-ventral axes (Menon et al.  
126 2020). Using T1w/T2w maps, Royer et al. uncovered two principal gradients of human insula  
127 myeloarchitecture showing one from ventral anterior to the posterior insula and the other from  
128 dorsal anterior to both ventral anterior and posterior insula (Royer et al. 2020). Taken together,  
129 apart from neuroimaging research with connectivity-based parcellation method on insula  
130 organization, several studies also considered that the insular cortex was characterized with the  
131 overall gradual change along the rostrocaudal or ventrodorsal axis. Until now, no neuroimaging  
132 study to our knowledge used connectivity-based parcellation or gradient method or both to  
133 explore the macrostructure of macaque insular cortex specifically. Therefore, the topographic  
134 organization of the macaque insula, representing the connectivity variation, remains unknown.

135       In this study, we used high spatial and angular resolution ex vivo macaque DWI data to  
136 investigate the topographic organization of the macaque insular cortex. First, we used a  
137 diffusion map embedding to examine macaque insula global gradients. Second, extracting the  
138 top and bottom components from the first two gradients, we performed connectivity-based  
139 parcellation to subdivide each component to uncover the elaborated macaque insula

140 organization. Third, using connectivity fingerprints, we examined the structural connectivity  
141 differences between the subregions subdivided from one component. Finally, we explored the  
142 relationships between macaque insula global gradients and two neuroimaging indices,  
143 including T1w/T2w and thickness maps. Here, we hypothesized that the globally spatial  
144 representation of macaque insula would show a rostrocaudal gradient, and the elaborated  
145 subdivisions of macaque insula would show medial-lateral or ventrodorsal pattern along the  
146 rostrocaudal gradient.

147

## 148 **2. Materials and methods**

### 149 **2.1 Data acquisition**

#### 150 **2.1.1 Ex vivo macaque brains**

151 Eight ex vivo macaque (*Macaca mulatta*; 2 males, 6 females;  $5.6 \pm 1.06$  years of age) brains  
152 were collected, and the experimental protocols were approved by the National Animal  
153 Research Authority of China and the Ethics Review Committee of Biomedical Research of the  
154 Institute of Automation, Chinese Academy of Sciences. MRI data contained T2-weighted (T2w)  
155 and DWI images which were obtained from a 9.4-T horizontal animal MRI system (Bruker  
156 BioSpec 94/30 USR) with Paravision 6.0.1. The gradients were equipped with a slew rate of  
157 4570 mT/m/ms and maximum strength of 660 mT/m. A 72 mm inner diameter quadrature  
158 radiofrequency coil achieved the radiofrequency transmission and reception. Prior to imaging,  
159 each postmortem macaque brain was soaked in 1L phosphate buffered saline with 1mM/L  
160 gadopentetate dimeglumine (Gd-DTPA) at 4 °C and shook daily for at least 1 month to reduce  
161 T1 relaxation time ([D'Arceuil et al. 2007](#)). A 3D spin-echo EPI diffusion weighted sequence  
162 was used to acquire multi-shell DWI with echo time (TE) = 25 ms, repetition time (TR) = 200  
163 ms, 186 or 129 diffusion directions (7 brain DWI images, 6 b = 0 s/mm<sup>2</sup>, 60 b = 1200 s/mm<sup>2</sup>,  
164 120 b = 4800 s/mm<sup>2</sup>; 1 brain DWI image, 6 b = 0 s/mm<sup>2</sup>, 30 b = 1200 s/mm<sup>2</sup>, 93 b = 4800  
165 s/mm<sup>2</sup>), field of view (FOV) = 66.6 × 54.0 × 72.0 mm<sup>3</sup>, flip angle (FA) = 90°, matrix = 148 ×  
166 120 × 160 and voxel size = 0.45 × 0.45 × 0.45 mm<sup>3</sup> without gap. T2w images were obtained  
167 by a 3D MSME sequence with TE = 36 ms, TR = 2000 ms, FOV = 72.0 × 54.0 × 80.1 mm<sup>3</sup>,  
168 FA = 90°, matrix = 240 × 180 × 267 and voxel size = 0.3 × 0.3 × 0.3 mm<sup>3</sup>.

169

### 170 **2.1.2 In vivo macaque brains**

171 Eight in vivo macaque (*Macaca mulatta*; male) brain MRI data used in this study was obtained  
172 from TheVirtualBrain (Shen et al. 2019). The Animal Use Subcommittee approved the  
173 experimental protocols of the University of Western Ontario Council on Animal Care. They  
174 were following Canadian Council of Animal Care guidelines. The neuroimaging protocol  
175 included T1-weighted (T1w) and DWI images acquired by the 7.0-T Siemens MAGNETOM  
176 head scanner with a gradient (Siemens AC84 II,  $G_{max} = 80$  mT/m,  $SlewRate = 400$  T/m/s).  
177 T1w images were collected by an MP2RAGE acquisition with  $TR = 6500$  ms,  $TE = 3.15$  ms,  
178  $TI1 = 800$  ms,  $TI2 = 2700$  ms,  $matrix = 256 \times 256$ , 128 slices and  $voxel\ size = 0.5 \times 0.5 \times 0.5$   
179  $mm^3$ , and only T1w images were analyzed in our study.

180

### 181 **2.2 Data preprocessing**

182 Preprocessing of macaque ex vivo DWI data included reorienting the initial brain space into  
183 RAS space, denoising (Veraart et al. 2016), removing ringing artifacts (Kellner et al. 2016),  
184 eddy currents correction (Graham et al. 2016), brain-tissue extraction on b0 image (Smith 2002)  
185 and refining brain mask manually, which were respectively implemented in the Medical Image  
186 Processing, Analysis and Visualization (MIPAV) (<https://mipav.cit.nih.gov/>), MRtrix3  
187 (Tournier et al. 2019), FMRIB Software Library (FSL v6.0) (Woolrich et al. 2009; Jenkinson  
188 et al. 2012) and ITK-SNAP (<http://www.itksnap.org/>). N4BiasFieldCorrection (Tustison et al.  
189 2010) within Advanced Normalization Tools (ANTs) (<http://stnava.github.io/ANTs/>) was  
190 performed to correct a b0 image for the subsequent registration. Then DTIFIT (Smith et al.  
191 2004) was used to fit a diffusion model to check the principal eigenvector within brain voxels  
192 in the native space. After confirming the principal eigenvector, BEDPOSTX (Jbabdi et al. 2012)  
193 was performed to estimate the distribution of three fiber orientations at each voxel.

194 Given the use of Gd-DTPA and the absence of ex vivo T1w image, we inverted the contrast  
195 of T2w or b0 image to obtain a fake T1w image (Ambrosen et al. 2020) which was then  
196 preprocessed by the HCP-NHP pipeline (Autio et al. 2020), including warping the individual  
197 volume image into the standard Yerks19 template (Donahue et al. 2018) using FSL, surface



198 construction using Freesurfer (<https://surfer.nmr.mgh.harvard.edu/>) and mapping the individual  
199 space into the Yerk19 surface using the multimodal surface matching algorithm ([Robinson et](#)  
200 [al. 2014](#)) (details in Fig. S1).

201 The T1w images of macaque in vivo TheVirtualBrain dataset were also preprocessed by  
202 the HCP-NHP pipeline (details in Fig. S1).

203

### 204 **2.3 Definition of macaque insula ROI**

205 Our macaque insula ROI, mainly defined by the sulcus and gyrus, was delineated in a  
206 postmortem macaque b0 template (CIVM) ([Calabrese et al. 2015a](#)) with labels of Paxinos et  
207 al.'s macaque atlas ([Paxinos et al. 2009](#)) at the 0.3-mm isotropic resolution. More specifically,  
208 first, we extracted the insula mask, including Ia, Id, Ig, and IPro (insular proisocortex), which  
209 was defined in the CIVM atlas. This insula mask's ventral and dorsal extent was bounded by  
210 the inferior and superior limiting sulcus of the insula, respectively, and its anterior extent  
211 bordered ventrally on the piriform cortex. Second, we delineated the most anterior insula mask  
212 with five regions, including Iam, Ial, Iapm, Iai and Iapl, which were defined in the D99 template  
213 ([Reveley et al. 2016](#)) with labels of Saleem et al.'s macaque atlas ([Saleem and Logothetis 2007](#)).  
214 These five regions were transformed from the D99 space into the CIVM space using ANTs. In  
215 the CIVM space, the lateral extent of this mask was delimited by the inferior limiting of the  
216 insula and its extended line, and the medial extent bordered posteriorly on the anterior olfactory  
217 nucleus and medially piriform cortex. Finally, we merged these two masks into our macaque  
218 insula ROI in the CIVM space, and the detailed volume ROI was shown in Fig. S2.

219

### 220 **2.4 Macaque insula SC gradients**

221 We aimed to construct a macaque insula connectome in the common volume space, a  
222 symmetrical cross-correlation matrix, which could reveal the similarity of connectivity patterns  
223 within voxels, and then be unveiled by the diffusion embedding to explore global insula spatial  
224 distributions. For each ex vivo macaque brain, nonlinear registration ([Avants et al. 2014](#)) within  
225 ANTs was applied to estimate a deformation field between the individual b0 image and CIVM  
226 b0 template with an isotropic resolution of 0.3 mm. Given a decrease of the voxel number

227 transformed from the high-resolution b0 template to a low-resolution individual b0 image, we  
228 resampled the macaque insula template mask into the 0.6-mm isotropic resolution, and then  
229 labeled all the voxels within the insula mask from 1 to M. According to the estimated  
230 deformation field, the insula mask was warped from the CIVM space with the isotropic  
231 resolution of 0.6 mm into the individual space with a 0.45-mm isotropic resolution using  
232 nearest-neighbor interpolation. In the individual space, the probability between each voxel in  
233 the insula mask and the brain voxels (N) was calculated by the probabilistic tractography using  
234 Probtrackx2 (Behrens et al. 2007) with the step length of 0.25 mm (Bryant et al. 2020) and  
235 curvature threshold of 0.2, and the pial surfaces generated in the previous HCP-NHP pipeline  
236 were treated as a stop mask to prevent fiber tracking from crossing sulci. Five thousand  
237 streamlines per insula voxel were tracked to calculate the connectivity profiles, and we  
238 averaged the connectivity profiles of voxels with the same label one by one to obtain the  
239 individual M-by-N matrix. Then, a cross-correlation M-by-M matrix was calculated to reveal  
240 the similarity between the voxels with different labels. Finally, we averaged all the subjects  
241 cross-correlation matrices to obtain a group-level cross-correlation M-by-M matrix with the  
242 min-max normalization.

243 A diffusion map algorithm (Berry and Harlim 2016) was applied to the group-level cross-  
244 correlation matrix to obtain ten gradients of insula. The variance was calculated within each  
245 gradient and normalized to acquire the explained variance of the gradient. The gradients in the  
246 CIVM space were warped into the Yerks19 space using nonlinear registration within ANTs. We  
247 normalized each gradient in the volume space and then mapped it to the 32k Yerks19 surface  
248 for display using Connectome Workbench (<https://www.humanconnectome.org/>).

249

## 250 **2.5 SC-based parcellation**

251 In the CIVM space, we extracted the top and bottom 25% of all insula voxels in the dominant  
252 gradient, and also extracted the top and bottom 25% of the rest insula voxels in the second  
253 gradient. The four components were treated as the ROIs, which were subdivided using the SC-  
254 based parcellation frame (Fan et al. 2016). The main steps can be summarized as follows: first,  
255 the ROI was warped from the CIVM space into the individual space using the estimated

256 deformation field. Second, individual pial surfaces were conducted as the stopping mask, and  
257 5000 streamlines per voxel in the individual ROI were tracked to construct the connectivity  
258 matrix between the ROI and brain voxels using Probtrackx2. Third, in the individual space, we  
259 obtained the cross-correlation matrix by multiplying the connectivity matrix by its transpose,  
260 which was used as an input to the spectral clustering algorithm (Ng et al. 2002). Fourth, cluster  
261 number was set from 2 to 6 and the individual parcellation results were warped into the CIVM  
262 space. Finally, for each cluster solution, the maximum probabilistic map of one subregion was  
263 acquired by identifying that the probability of voxel belonging to the subregion is more than  
264 50% across the subjects. Additionally, to avoid the arbitrary selection of clusters, the cross-  
265 validation indices Cramer's V and topological distance (TpD) (Li et al. 2017) were calculated  
266 to choose the optimal cluster across all subjects.

267

## 268 **2.6 SC pattern**

269 After obtaining four components from the insula gradients and subregions from the subdivision  
270 on the component, we characterized their connectivity profiles using the probabilistic tracking  
271 strategy used in the SC parcellation. For the component or subregion, 50000 samples per voxel  
272 were tracked to the whole brain using Probtrackx2, and also the pial surfaces were served as  
273 the stop mask. For each subject, the connectivity profile of one component or subregion was  
274 only focused on the ipsilateral hemisphere and transformed into the CIVM space. To further  
275 reduce the false positive connections,  $3.08 \times 10^{-5}$  for the samples (He et al. 2020) was used to  
276 binarize the connectivity profile. We averaged connectivity profiles of the subregion across the  
277 subjects to get the probabilistic connectivity profile, and the threshold 0.5 was used to obtain  
278 the group-level connectivity profile for the given subregion.

279 Meanwhile, we also performed connectivity fingerprints (Passingham et al. 2002) to reveal  
280 the connectivity pattern between insula component or subregion and ipsilateral target ROIs.  
281 The main procedures were summarized as follows: first, all cortical and subcortical regions in  
282 the CIVM atlas with Paxinos et al.'s labels of macaque atlas (Paxinos et al. 2009) were extracted  
283 as the target ROIs. Second, after obtaining the connectivity profiles thresholded in the CIVM  
284 space, the connectivity values were calculated by averaging the voxel values within all the

285 target ROIs for each component or subregion, and then we averaged the connectivity values  
286 across the subjects to obtain the initial connectivity fingerprints. Third, for all components or  
287 subregions, we thresholded the connectivity fingerprints at  $>0.001$  and then merged some  
288 regions with similar connectivity patterns into one homogenous region. For example, area 10  
289 and its dorsal, medial, ventral part were merged into one target ROI. Thus, a target ROI family  
290 was generated, containing 29 cortical and 6 subcortical regions (details in Tabel S1). Fourth,  
291 in the one subject, we recalculated the connectivity fingerprints using the new target ROIs  
292 family again for all the components or subregions with the previous step 2. The connectivity  
293 fingerprints of one subject were normalized by summing all the connections to 1 (Mars et al.  
294 2012; Xia et al. 2017) within one component or subregion in all target ROIs and subsequently  
295 within all the components or subregions in one target ROI. Finally, the connectivity fingerprints  
296 of the components or subregions were constructed by averaging the individual normalized  
297 connectivity fingerprints across the subjects.

298 A permutation test (Mars et al. 2016) was performed to investigate the difference of  
299 connectivity fingerprints between the two subregions that originated from the component  
300 subdivisions. More specifically, after obtaining the normalized fingerprints of all subjects, we  
301 calculated the Manhattan distance between the connectivity fingerprints of the two subregions  
302 with 35 targets ROIs within all subjects to characterize the observed difference between the  
303 connectivity patterns of the two subregions. The hypothesis is that the difference between the  
304 connectivity patterns of the two subregions was higher than expected by chance. Subsequently,  
305 the Manhattan distances between the subregions were calculated for the 10000 permutations  
306 for connectivity fingerprints of two subregions. If the observed Manhattan distance was higher  
307 than the criterion derived from the permutation test ( $p < 0.05$ ), the two subregions subdivided  
308 from the component would show significant differences in the connectivity pattern.

309

## 310 **2.7 Relation to the T1w/T2w and cortical thickness map**

311 The cortical thickness maps in the Yerks19 space (Donahue et al. 2018) were generated by the  
312 HCP-NHP pipeline in the macaque in vivo dataset. By averaging the cortical thickness maps  
313 across the subjects, we obtained the group-level cortical thickness map. The correlation

314 analysis was performed to investigate the relationship between the insula dominant gradients  
315 and the insula cortical thickness maps by the vertex values of the insula in the Yerks19 space.  
316 To explore the relationship between insula SC gradients and T1w/T2w map, we used the  
317 standard T1w/T2w map in the HCP-NHP pipeline, and then separated and resampled it into the  
318 32k space using Connectome Workbench. Likewise, the correlation analysis was performed to  
319 investigate the relationship between the insula dominant gradients and T1w/T2w maps.

320

### 321 **3. Results**

#### 322 **3.1 SC gradients of macaque insula**

323 Based on the macaque insula SC connectome, diffusion maps revealed global spatial  
324 distributions of the insular cortex where the top two insula gradients explained the variance  
325 over 50% in total. We only focused on the top two gradients, and the others explained the  
326 variance all below 10%. The dominant gradient (G1) explained 45.7% and 41.5% variance of  
327 the left and right insula respectively (Fig. 1A). It showed a gradual increase along the  
328 rostrocaudal axis (Fig. 1B, top). The second gradient (G2), accounting for 16.0% and 15.1%  
329 variance for the left and right insula (Fig. 1A), showed the highest proportion in the middle  
330 insula and a gradual decrease from the middle to the rostral and caudal direction separately  
331 (Fig. 1B, bottom).

332

#### 333 **3.2 Parcellation of macaque insula based on SC gradients**

334 The four components (INS1-4), including the top and bottom 25% of G1 and the additional top  
335 and bottom 25% of G2, were extracted and merged into the initial partition of the insula with  
336 the parallel rostral to the caudal pattern (Fig. 2A). With the highest CV and TpD indices, these  
337 four components from INS1 to INS4 were all subdivided into two subregions (Fig. 2B),  
338 including anteromedial and anterolateral Ia (Iaam and Iaal), posterodorsal and posteroventral  
339 Ia (Iapd and Iapv), dorsal and ventral Id (Idd and Idv), and dorsal and ventral Ig (Igd and Igv)  
340 (Fig. 2C).

341

#### 342 **3.3 SC fingerprint of macaque insula subregion**

343 INS1, adjacent to area 13 medially, was located in the rostral part of the macaque insula, and  
344 was subdivided into two subregions, including the medial portion Iaam and the lateral portion  
345 Iaal (Fig. 2B). INS1 had strong ipsilateral connections with area 10, 46, 47, 11, 13, 14, 25, 32,  
346 36R, TP and subcortical regions Acb, Str, Amyg, Pir (Fig. 3A). Using permutation tests, the  
347 two subregions showed significant differences (LH:  $p < 0.0001$ , RH:  $p < 0.0001$ ) in the  
348 connectivity fingerprints and Iaam showed higher connections with area 14, 25, 36R, and Pir,  
349 whereas area 10, 46, 47, 11, 13, 32, Tha, Acb and Amyg had higher connections with Iaal (Fig.  
350 4A).

351 INS2 covered the anterior domain of the middle insula just posterior to INS1, which was  
352 parcellated into two subregions, including the dorsal portion Iapd and the ventral portion Iapv  
353 (Fig. 2B). INS2 had high ipsilateral connections with area ProM, Gu, 25, PaI, STS, TP and  
354 subcortical regions Tha, Pir, Str, Pd (Fig. 3B). Significant differences (LH:  $p < 0.0001$ , RH:  $p$   
355  $< 0.0001$ ) were also found by permutation tests between the connectivity fingerprints of these  
356 two subregions. Iapd had higher connections with area ProM, Gu, 6VR, 2/1, Tha, and Pd,  
357 whereas area PPt, 36R, MST, PaA, PaI, STS, TP and Amyg showed higher connections with  
358 Iapv (Fig. 4B).

359 INS3 occupied the posterior domain of the middle insula just posterior to INS2, and was  
360 subdivided into two subregions, including the dorsal portion Idd and the ventral portion Idv  
361 (Fig. 2B). INS3 had strong ipsilateral connections with areas 44, 45, ProM, Gu, 6VR, 8AV, 2/1,  
362 PE, PPt, S2, AK, MST, PaA, ProK, STS, TPt, and subcortical regions Tha, Pd (Fig. 3C).  
363 Permutations tests identified significant differences (LH:  $p < 0.0001$ , RH:  $p = 2.00 \times 10^{-4}$ )  
364 between connectivity fingerprints of these two subregions. Idd showed higher connections with  
365 areas 44, 45, ProM, Gu, 6VR, 2/1, S2, Tha and Pd, whereas Idv had higher connections with  
366 36R, AK, MST, ProK, STS, and TPt (Fig. 4C).

367 INS4, adjacent to the S2 and ProK laterally, was located in the posterior domain of the  
368 insula and was parcellated into two subregions, including the dorsal portion Igd and the ventral  
369 portion Igv (Fig. 2B). INS4 had strong ipsilateral connections with areas 44, 45, 6VR, 8AV, PE,  
370 IPL, PPt, S2, AK, MST, PaA, ProK, ReI, TPt, and subcortical regions Tha, Pd (Fig. 3D).  
371 Significant differences (LH:  $p < 0.0001$ , RH:  $p < 0.0001$ ) were identified by permutation tests

372 between the connectivity fingerprints of these two subregions. Igd showed higher connections  
373 with areas 44, 45, 6VR, 8AV, and S2, whereas area PE, PPt, AK, MST, PaA, ProK and ReI had  
374 higher connections with Igv (Fig. 4D).

375

### 376 **3.4 Relationships between gradients and T1w/T2w, cortical thickness maps**

377 Macaque insula G1 correlated positively with insula T1w/T2w map (LH:  $r = 0.46$ ,  $p < 0.0001$ ;  
378 RH:  $r = 0.43$ ,  $p < 0.0001$ ) (Fig. 5A), and negatively with insula thickness map (LH:  $r = -0.31$ ,  
379  $p < 0.0001$ ; RH:  $r = -0.28$ ,  $p < 0.0001$ ) (Fig. 5B). However, G2 correlated negatively with insula  
380 T1w/T2w map (LH:  $r = -0.43$ ,  $p < 0.0001$ ; RH:  $r = -0.40$ ,  $p < 0.0001$ ) (Fig. 5A), and positively  
381 with insula thickness map (LH:  $r = 0.26$ ,  $p < 1.16e-14$ ; RH:  $r = 0.29$ ,  $p < 6.31e-19$ ) (Fig. 5B).

382

## 383 **4. Discussion**

384 Based on structural connectivity, this study investigated global gradients and subdivisions in  
385 the macaque insular cortex and also explored the relationship between insula global gradients  
386 and its morphology and microstructure. The insula G1 revealed the gradually rostrocaudal  
387 increases, whereas the insula G2 represented gradual increases from the rostral and caudal  
388 portions to the middle domain. Extracting four components from the first two insula gradients,  
389 a connectivity-based parcellation method was performed to subdivide each component into two  
390 subregions, showing medial-lateral or dorsal-ventral parcellation pattern. Moreover, these two  
391 subregions showed significant differences between their connectivity fingerprints by  
392 permutation tests. In addition, insula gradients also captured the characteristics of T1w/T2w  
393 and thickness maps. Overall, macaque insula gradients or subdivisions using neuroimaging  
394 provided insights to comparative or translational medicine research.

395

### 396 **4.1 Macaque insula gradients and parcellations**

397 We examined the spatial representation of structural connectivity variation across macaque  
398 insula territory and found a rostrocaudal gradient (Fig. 6A top). This result was similar to a  
399 cytoarchitectonic study with multiple stains reporting that parallel ventral to dorsal gradients  
400 were found in the middle layer of the macaque insula (Fig. 6B) ([Gallay et al. 2012b](#)). Our result



401 was consistent with a human neuroimaging study showing that probabilistic tractography  
402 uncovered a rostrocaudal trajectory of connectivity variability in the human insula (Cerliani et  
403 al. 2012a). However, the comparability across species is not clear and requires further  
404 examination. Besides, we constituted a 4-subregion parcellation pattern by extracting the top  
405 and bottom 25% components from the first two gradients instead of directly hard clustering  
406 algorithms to subdivide macaque insula. Given the unstable boundaries in the middle insula by  
407 the hard clustering reported in a previous study (Nanetti et al. 2009), such extract method  
408 making up 4-subregion pattern could guarantee that the two subregions from one insula  
409 gradient represented the maximum connectivity variations. More interestingly, the three  
410 subregions INS2-4 posterior to the limen insula in the 4-subregion pattern spatially arranged  
411 by a cytoarchitectonic study of the macaque insula with an anteroposterior parcellation (Fig.  
412 6C) (Calabrese et al. 2015a; Paxinos et al. 2009). Moreover, the subdivision of INS2, which  
413 was parcellated into Iapd and Iapv, was similar to the Ia and IPro in the Paxinos et al.'s macaque  
414 atlas that Ia showed more SMI reactivity than IPro in the infragranular layers (Paxinos et al.  
415 2009). In case of these three subregions, the subdivision results all revealed the ventrodorsal  
416 pattern, similar to the cytoarchitectonic study showing the dorsal and ventral architectonic areas  
417 of the macaque posterior insula (Fig. 6D) (Evrard et al. 2014). Concerning the subregion INS1  
418 in the posterior surface of the orbitofrontal lobe, the subdivision of this region showed a medial-  
419 lateral pattern which also corresponded to a previous histology study subdividing the  
420 proportion of insula anterior to limen insula into Iam, Iai, Ial, Iapm, and Iapl (Carmichael and  
421 Price 1994b). Taken together, our results revealed the structural organization of macaque insula,  
422 showing from the global anteroposterior gradient pattern to the mediolateral or ventrodorsal  
423 subdivision pattern locally, which were both consistent with the previous cytoarchitectonic  
424 studies on macaque insula.

425

#### 426 **4.2 Macaque insula SC**

427 Apart from research on the structural organization of macaque insula, the present study also  
428 investigated the structural connectivity of the insula subregions. INS1 had strong structural  
429 connectivity with the lateral prefrontal cortex, orbitofrontal cortex, anterior cingulate gyrus,



430 perirhinal cortex, Pir, and Acb. More specifically, the lateral subregion Iaal, subdivided from  
431 the INS1, showed higher connections with areas 10, 46, 47, 32, 11, 13, and Acb, whereas the  
432 medial subregion Iaam connected strongly with area 14, 25, and Pir. The previous tracer study  
433 reported anatomical connections between area 10 and the posterior orbitofrontal lobe ([Petrides  
434 and Pandya 2007](#)). The macaque frontal pole was thought to play a critical role in cognitive  
435 processing, such as complex and higher-order behaviors ([Boschin et al. 2015](#)). Previous lesion  
436 studies ([Murphy and Bachevalier 2020](#)) and tasks ([Setogawa et al. 2019](#)) revealed that  
437 orbitofrontal areas 11, 47, and 13 played vital roles in the attention, reward and may also  
438 participate in social behavior. Thus, the connections between Iaal and these regions may  
439 indicate that the lateral subregion of INS1 was associated with the higher cognitive functions.  
440 In addition, in one tracer study ([Carmichael et al. 1994](#)), Pir was connected with two  
441 cytoarchitectonic insula areas (Iam and Iapm) corresponding to the subregion Iaam in our  
442 research. Pir plays a vital role in the processing and encoding of olfactory information ([Boyett-  
443 Anderson et al. 2003](#)), and area 14 also participates in olfactory-related function ([Ongur and  
444 Price 2000](#)). Therefore, the medial subregion Iaam of INS1 may play an essential role in the  
445 processing of olfactory information. For areas 25 and 32, the recent study suggested that these  
446 two regions of the primate were involved in the opposite roles in regulating negative emotion,  
447 such as the cardiovascular and behavioral correlates ([Wallis et al. 2017](#)). In our study, the two  
448 subregions, Iaam and Iaal, showed high connections, respectively, with areas 25 and 32  
449 indicating the different roles of the two subregions in the emotion regulations. INS1 plays a  
450 crucial role in the higher cognitive functions and participates in the processing of olfactory  
451 information.

452 This study, INS2 connected strongly with the ProM, Gu, PaI, STS, TP, Tha, and Amyg.  
453 The dorsal subregion Iapd, parcellated from INS2, showed higher structural connectivity with  
454 the ProM, Gu, and Tha, whereas the ventral subregion Iapv showed stronger SC with the Amyg.  
455 Previous evidence considered that the taste pathway of the macaque brain contained the nucleus  
456 of the solitary tract, thalamus, anterior insula, Gu, orbitofrontal cortex, amygdala, anterior  
457 cingulate cortex, and hypothalamus ([Rolls 2019](#)). Thus, the INS2 was mainly responsible for  
458 integrating taste information and participated in the feeding processing. A previous tracer study

459 reported that the TP region had anatomical connectivity with agranular, parainsular, and  
460 dysgranular insula, the medial frontal, and orbitofrontal cortex, implicating the TP was  
461 associated with the auditory-related memory processing ([Corcoles-Parada et al. 2019](#)). In our  
462 study, Iapv, connected with TP and PaI, may participate in the auditory memory function.

463 The dorsal subregions Idd and Igd, subdivided from the INS3 and INS4 respectively, had  
464 strong connections with 6VR, verified by a tracer study ([Morecraft et al. 2015](#)), reporting the  
465 anatomical connectivity of the dysgranular insula with the ventral premotor area. In addition,  
466 Idd and Igd showed strong connections with areas 44, 45, and IPL. The previous study ([Petrides  
467 and Pandya 2009](#)) has considered that macaque areas 44 and 45 may be homologous to the  
468 human Broc's area. The ventral premotor mainly controlled the hand ([Kraskov et al. 2009](#)) and  
469 orofacial ([Ferrari et al. 2003](#)) musculature. IPL also was demonstrated by the recent study to  
470 be homologous in the primate and was mainly involved in the tool use and language ([Cheng et  
471 al. 2021](#)). Taken together, the Idd and Igd may be a participant in the hand control and orofacial  
472 motor in the rhesus monkey, such as vocalization. In addition, the connections of Idd and Igd  
473 also showed higher connections with areas 2/1 and S2, indicating that these two subregions  
474 were mainly involved in the somatosensory functions. Concerning the ventral subregions of  
475 INS3 and INS4, Idv and Igv both had higher connections with AK and PaA, indicating that  
476 these two subregions were mainly responsible for integrating the auditory information, and  
477 together with the abovementioned subregion Iapv, thus these three ventral subregions played  
478 an vital role in the auditory function.

479

### 480 **4.3 Macaque insula gradient captures structural features**

481 After identifying the gradient of the macaque insula based on structural connectivity, we  
482 investigated the underlying architectonic mechanisms of macaque insula microstructure and  
483 morphology, discovering close correlations between insula thickness, T1w/T2w and  
484 connectivity-based gradient. The macaque insular cortex was characterized by the lamination  
485 pattern and also revealed by the architectonic gradient of cortical layers ([Gallay et al. 2012a](#)).  
486 In neuroimaging, T1w/T2w ratio, detecting the architectonic organization, is a proxy for the  
487 myelin content in the cortical regions. Moreover, the macaque insula has been considered to be

488 an inconsistent cortical area with a differentiated layer of myeline (Mesulam and Mufson 1982;  
489 Evrard et al. 2014). Therefore, in this study, the relationship between the gradients and  
490 T1w/T2w map indicated that the spatial distribution of connectivity variation was corresponded  
491 to the myelination, suggesting that the macroscopic organization of the macaque insular cortex  
492 may capture the underlying microstructural features to some extent. In addition, we also  
493 detected the correlation between the gradient and thickness in the macaque insular cortex. This  
494 finding was consistent with the previous finding that the gradient of human thalamus correlated  
495 with its gray matter volume (Yang et al. 2020). The cortical thickness, measuring the depth of  
496 the cortical column, was the macroscopic representation of the layer physical features, which  
497 exhibited the incongruous characteristics in the macaque insula. Our finding, correlations of  
498 gradient and thickness, may indicate that the variation of structural connectivity in the macaque  
499 insular cortex was associated with its morphological structure. Overall, the relationship of  
500 gradients, T1w/T2w and thickness suggested that the macro-structural organization of the  
501 macaque insular cortex may be in accordance with its microstructure and morphology.

502

#### 503 **4.4 Limitations**

504 Several limitations should be mentioned in the present study here. First, although the insula 4-  
505 subregion parcellation pattern appeared to be similar to the previous histological studies by  
506 extracting the 25% component from the global gradient, the chosen threshold was relatively  
507 subjective and required further examination. Second, due to the lack of in vivo MRI data of  
508 macaque brain collected by us, the correlation analysis on the relationship between the insula  
509 gradient and thickness was not conducted on the MRI data of the same macaque brains, which  
510 may influence our findings. Third, we did not construct the T1w/T2w map and just used the  
511 existed template to explore the relationship between the insula gradient and the T1w/T2w map,  
512 which weakened the interpretability of correlation analysis findings.

513

#### 514 **5. Conclusion**

515 Using high-resolution ex vivo diffusion MRI data, this study revealed the topographic  
516 organization of macaque insular cortex globally and locally based on structural connectivity.

517 The gradient and parcellation of the macaque insular cortex were both similar to the  
518 histological architecture reported by the previous studies. Furthermore, permutation tests  
519 associated with connectivity fingerprint were performed to confirm the subdivisions of 8  
520 subregions parcellated from the 4 components. Besides, the relationships between insula  
521 gradients and the T1w/T2w, thickness maps also suggested that the macroscopic connectivity  
522 variation across the cortical territory in the macaque insula may capture the underlying  
523 morphological and microstructural features. Overall, our study investigated macaque insula  
524 architecture from the perspective of structural connectivity, which may provide an insight into  
525 the following comparative research across species.

526

### 527 **Author contributions**

528 Tianzi Jiang led the project. Tianzi Jiang and Lingzhong Fan were responsible for the design  
529 of the concept and study. Long Cao, Zhongchang Du and Yue Cui contributed to the writing,  
530 coding, plotting and validation of the pipeline. All the authors participated in discussions of the  
531 results and revision of the manuscript.

532

### 533 **Acknowledgments**

534 This work was partially supported by Science and Technology Innovation 2030 - Brain Science  
535 and Brain-Inspired Intelligence Project of China (Grant No. 2021ZD0200200), the National  
536 Natural Science Foundation of China (Grant Nos. 31620103905, 82151307, and 82072099),  
537 the Science Frontier Program of the Chinese Academy of Sciences (Grant No. QYZDJ-SSW-  
538 SMC019), National Key R&D Program of China (Grant No. 2017YFA0105203), and the  
539 Strategic Priority Research Program of Chinese Academy of Sciences (XDB32030200).

540

### 541 **Conflict of interest**

542 The authors declare that they have no conflict of interest.

543

### 544 **Data and code availability**

545 The data and codes that support the findings of this study are available from the corresponding

546 author upon reasonable request.

547

## 548 **References**

- 549 Ambrosen KS, Eskildsen SF, Hinne M, Krug K, Lundell H, Schmidt MN, van Gerven MAJ, Morup M,  
550 Dyrby TB (2020) Validation of structural brain connectivity networks: The impact of scanning  
551 parameters. *Neuroimage* 204:116207. <https://doi:10.1016/j.neuroimage.2019.116207>
- 552 Autio JA, Glasser MF, Ose T, Donahue CJ, Bastiani M, Ohno M, Kawabata Y, Urushibata Y, Murata K,  
553 Nishigori K, Yamaguchi M, Hori Y, Yoshida A, Go Y, Coalson TS, Jbabdi S, Sotiropoulos SN,  
554 Kennedy H, Smith S, Van Essen DC, Hayashi T (2020) Towards HCP-Style macaque connectomes:  
555 24-Channel 3T multi -array coil, MRI sequences and preprocessing. *Neuroimage* 215.  
556 <https://doi:10.1016/j.neuroimage.2020.116800>
- 557 Avants BB, Tustison NJ, Stauffer M, Song G, Wu B, Gee JC (2014) The Insight ToolKit image registration  
558 framework. *Front Neuroinform* 8:44. <https://doi:10.3389/fninf.2014.00044>
- 559 Behrens TE, Berg HJ, Jbabdi S, Rushworth MF, Woolrich MW (2007) Probabilistic diffusion tractography  
560 with multiple fibre orientations: What can we gain? *Neuroimage* 34 (1):144-155.  
561 <https://doi:10.1016/j.neuroimage.2006.09.018>
- 562 Berry T, Harlim J (2016) Variable bandwidth diffusion kernels. *Appl Comput Harmon A* 40 (1):68-96.  
563 <https://doi:10.1016/j.acha.2015.01.001>
- 564 Boschini EA, Piekema C, Buckley MJ (2015) Essential functions of primate frontopolar cortex in cognition.  
565 *Proc Natl Acad Sci U S A* 112 (9):E1020-1027. <https://doi:10.1073/pnas.1419649112>
- 566 Boyett-Anderson JM, Lyons DM, Reiss AL, Schatzberg AF, Menon V (2003) Functional brain imaging of  
567 olfactory processing in monkeys. *Neuroimage* 20 (1):257-264. [https://doi:10.1016/s1053-  
568 8119\(03\)00288-x](https://doi:10.1016/s1053-8119(03)00288-x)
- 569 Bryant KL, Li L, Eichert N, Mars RB (2020) A comprehensive atlas of white matter tracts in the chimpanzee.  
570 *PLoS Biol* 18 (12):e3000971. <https://doi:10.1371/journal.pbio.3000971>
- 571 Calabrese E, Badea A, Coe CL, Lubach GR, Shi Y, Styner MA, Johnson GA (2015a) A diffusion tensor MRI  
572 atlas of the postmortem rhesus macaque brain. *Neuroimage* 117:408-416.  
573 <https://doi:10.1016/j.neuroimage.2015.05.072>
- 574 Calabrese E, Badea A, Coe CL, Lubach GR, Shi YD, Styner MA, Johnson GA (2015b) A diffusion tensor  
575 MRI atlas of the postmortem rhesus macaque brain. *Neuroimage* 117:408-416.  
576 <https://doi:10.1016/j.neuroimage.2015.05.072>
- 577 Carmichael ST, Clugnet MC, Price JL (1994) Central olfactory connections in the macaque monkey. *J Comp*  
578 *Neurol* 346 (3):403-434. <https://doi:10.1002/cne.903460306>
- 579 Carmichael ST, Price JL (1994a) Architectonic Subdivision of the Orbital and Medial Prefrontal Cortex in  
580 the Macaque Monkey. *Journal of Comparative Neurology* 346 (3):366-402. [https://doi:DOI  
581 10.1002/cne.903460305](https://doi:DOI)
- 582 Carmichael ST, Price JL (1994b) Architectonic subdivision of the orbital and medial prefrontal cortex in the  
583 macaque monkey. *J Comp Neurol* 346 (3):366-402. <https://doi:10.1002/cne.903460305>
- 584 Caruana F, Jezzini A, Sbriscia-Fioretti B, Rizzolatti G, Gallese V (2011) Emotional and social behaviors  
585 elicited by electrical stimulation of the insula in the macaque monkey. *Curr Biol* 21 (3):195-199.  
586 <https://doi:10.1016/j.cub.2010.12.042>
- 587 Cerliani L, Thomas RM, Jbabdi S, Siero JC, Nanetti L, Crippa A, Gazzola V, D'Arceuil H, Keysers C (2012a)  
588 Probabilistic tractography recovers a rostrocaudal trajectory of connectivity variability in the human  
589 insular cortex. *Hum Brain Mapp* 33 (9):2005-2034. <https://doi:10.1002/hbm.21338>

- 590 Cerliani L, Thomas RM, Jbabdi S, Siero JCW, Nanetti L, Crippa A, Gazzola V, D'Arceuil H, Keysers C  
591 (2012b) Probabilistic tractography recovers a rostrocaudal trajectory of connectivity variability in  
592 the human insular cortex. *Human Brain Mapping* 33 (9):2005-2034. <https://doi:10.1002/hbm.21338>
- 593 Cheng L, Zhang Y, Li G, Wang J, Sherwood C, Gong G, Fan L, Jiang T (2021) Connectional asymmetry of  
594 the inferior parietal lobule shapes hemispheric specialization in humans, chimpanzees, and rhesus  
595 macaques. *Elife* 10. <https://doi:10.7554/eLife.67600>
- 596 Corcoles-Parada M, Ubero-Martinez M, Morris RGM, Insausti R, Mishkin M, Munoz-Lopez M (2019)  
597 Frontal and Insular Input to the Dorsolateral Temporal Pole in Primates: Implications for Auditory  
598 Memory. *Front Neurosci* 13:1099. <https://doi:10.3389/fnins.2019.01099>
- 599 D'Arceuil HE, Westmoreland S, de Crespigny AJ (2007) An approach to high resolution diffusion tensor  
600 imaging in fixed primate brain. *Neuroimage* 35 (2):553-565.  
601 <https://doi:10.1016/j.neuroimage.2006.12.028>
- 602 Di Cesare G, Pinardi C, Carapelli C, Caruana F, Marchi M, Gerbella M, Rizzolatti G (2019) Insula  
603 Connections With the Parieto-Frontal Circuit for Generating Arm Actions in Humans and Macaque  
604 Monkeys. *Cereb Cortex* 29 (5):2140-2147. <https://doi:10.1093/cercor/bhy095>
- 605 Donahue CJ, Glasser MF, Preuss TM, Rilling JK, Van Essen DC (2018) Quantitative assessment of prefrontal  
606 cortex in humans relative to nonhuman primates. *Proc Natl Acad Sci U S A* 115 (22):E5183-E5192.  
607 <https://doi:10.1073/pnas.1721653115>
- 608 Evrard HC (2019) The Organization of the Primate Insular Cortex. *Front Neuroanat* 13:43.  
609 <https://doi:10.3389/fnana.2019.00043>
- 610 Evrard HC, Forro T, Logothetis NK (2012) Von Economo neurons in the anterior insula of the macaque  
611 monkey. *Neuron* 74 (3):482-489. <https://doi:10.1016/j.neuron.2012.03.003>
- 612 Evrard HC, Logothetis NK, Craig AD (2014) Modular architectonic organization of the insula in the  
613 macaque monkey. *J Comp Neurol* 522 (1):64-97. <https://doi:10.1002/cne.23436>
- 614 Fan L, Li H, Zhuo J, Zhang Y, Wang J, Chen L, Yang Z, Chu C, Xie S, Laird AR, Fox PT, Eickhoff SB, Yu  
615 C, Jiang T (2016) The Human Brainnetome Atlas: A New Brain Atlas Based on Connectional  
616 Architecture. *Cereb Cortex* 26 (8):3508-3526. <https://doi:10.1093/cercor/bhw157>
- 617 Ferrari PF, Gallese V, Rizzolatti G, Fogassi L (2003) Mirror neurons responding to the observation of  
618 ingestive and communicative mouth actions in the monkey ventral premotor cortex. *European*  
619 *Journal of Neuroscience* 17 (8):1703-1714. <https://doi:10.1046/j.1460-9568.2003.02601.x>
- 620 Gallay DS, Gallay MN, Jeanmonod D, Rouiller EM, Morel A (2012a) The Insula of Reil Revisited:  
621 Multiarchitectonic Organization in Macaque Monkeys. *Cerebral Cortex* 22 (1):175-190.  
622 <https://doi:10.1093/cercor/bhr104>
- 623 Gallay DS, Gallay MN, Jeanmonod D, Rouiller EM, Morel A (2012b) The insula of Reil revisited:  
624 multiarchitectonic organization in macaque monkeys. *Cereb Cortex* 22 (1):175-190.  
625 <https://doi:10.1093/cercor/bhr104>
- 626 Graham MS, Drobnyak I, Zhang H (2016) Realistic simulation of artefacts in diffusion MRI for validating  
627 post-processing correction techniques. *Neuroimage* 125:1079-1094.  
628 <https://doi:10.1016/j.neuroimage.2015.11.006>
- 629 He B, Cao L, Xia X, Zhang B, Zhang D, You B, Fan L, Jiang T (2020) Fine-Grained Topography and  
630 Modularity of the Macaque Frontal Pole Cortex Revealed by Anatomical Connectivity Profiles.  
631 *Neurosci Bull* 36 (12):1454-1473. <https://doi:10.1007/s12264-020-00589-1>
- 632 Jbabdi S, Sotiropoulos SN, Savio AM, Grana M, Behrens TEJ (2012) Model-based analysis of multishell  
633 diffusion MR data for tractography: How to get over fitting problems. *Magnetic Resonance in*



- 634 Medicine 68 (6):1846-1855. <https://doi.org/10.1002/mrm.24204>
- 635 Jenkinson M, Beckmann CF, Behrens TE, Woolrich MW, Smith SM (2012) Fsl. Neuroimage 62 (2):782-790.  
636 <https://doi.org/10.1016/j.neuroimage.2011.09.015>
- 637 Jezzini A, Caruana F, Stoianov I, Gallese V, Rizzolatti G (2012) Functional organization of the insula and  
638 inner perisylvian regions. Proc Natl Acad Sci U S A 109 (25):10077-10082.  
639 <https://doi.org/10.1073/pnas.1200143109>
- 640 Kellner E, Dhital B, Kiselev VG, Reisert M (2016) Gibbs-Ringing Artifact Removal Based on Local  
641 Subvoxel-Shifts. Magnetic Resonance in Medicine 76 (5):1574-1581.  
642 <https://doi.org/10.1002/mrm.26054>
- 643 Kraskov A, Dancause N, Quallo MM, Shepherd S, Lemon RN (2009) Corticospinal neurons in macaque  
644 ventral premotor cortex with mirror properties: a potential mechanism for action suppression?  
645 Neuron 64 (6):922-930. <https://doi.org/10.1016/j.neuron.2009.12.010>
- 646 Li H, Fan L, Zhuo J, Wang J, Zhang Y, Yang Z, Jiang T (2017) ATPP: A Pipeline for Automatic Tractography-  
647 Based Brain Parcellation. Front Neuroinform 11:35. <https://doi.org/10.3389/fninf.2017.00035>
- 648 Mars RB, Sallet J, Schuffelgen U, Jbabdi S, Toni I, Rushworth MF (2012) Connectivity-based subdivisions  
649 of the human right "temporoparietal junction area": evidence for different areas participating in  
650 different cortical networks. Cereb Cortex 22 (8):1894-1903. <https://doi.org/10.1093/cercor/bhr268>
- 651 Mars RB, Verhagen L, Gladwin TE, Neubert FX, Sallet J, Rushworth MF (2016) Comparing brains by  
652 matching connectivity profiles. Neurosci Biobehav Rev 60:90-97.  
653 <https://doi.org/10.1016/j.neubiorev.2015.10.008>
- 654 Menon V, Gallardo G, Pinsk MA, Nguyen VD, Li JR, Cai W, Wassermann D (2020) Microstructural  
655 organization of human insula is linked to its macrofunctional circuitry and predicts cognitive control.  
656 Elife 9. <https://doi.org/10.7554/eLife.53470>
- 657 Mesulam MM, Mufson EJ (1982) Insula of the old world monkey. I. Architectonics in the insulo-orbito-  
658 temporal component of the paralimbic brain. J Comp Neurol 212 (1):1-22.  
659 <https://doi.org/10.1002/cne.902120102>
- 660 Mizuhiki T, Richmond BJ, Shidara M (2012) Encoding of reward expectation by monkey anterior insular  
661 neurons. J Neurophysiol 107 (11):2996-3007. <https://doi.org/10.1152/jn.00282.2011>
- 662 Morecraft RJ, Stilwell-Morecraft KS, Ge J, Cipolloni PB, Pandya DN (2015) Cytoarchitecture and cortical  
663 connections of the anterior insula and adjacent frontal motor fields in the rhesus monkey. Brain Res  
664 Bull 119 (Pt A):52-72. <https://doi.org/10.1016/j.brainresbull.2015.10.004>
- 665 Murphy LE, Bachevalier J (2020) Damage to Orbitofrontal Areas 12 and 13, but Not Area 14, Results in  
666 Blunted Attention and Arousal to Socioemotional Stimuli in Rhesus Macaques. Front Behav  
667 Neurosci 14:150. <https://doi.org/10.3389/fnbeh.2020.00150>
- 668 Nanetti L, Cerliani L, Gazzola V, Renken R, Keysers C (2009) Group analyses of connectivity-based cortical  
669 parcellation using repeated k-means clustering. Neuroimage 47 (4):1666-1677.  
670 <https://doi.org/10.1016/j.neuroimage.2009.06.014>
- 671 Ng AY, Jordan MI, Weiss Y (2002) On spectral clustering: Analysis and an algorithm. Advances in Neural  
672 Information Processing Systems 14, Vols 1 and 2 14:849-856
- 673 Ongur D, Price JL (2000) The organization of networks within the orbital and medial prefrontal cortex of  
674 rats, monkeys and humans. Cereb Cortex 10 (3):206-219
- 675 Passingham RE, Stephan KE, Kotter R (2002) The anatomical basis of functional localization in the cortex.  
676 Nat Rev Neurosci 3 (8):606-616. <https://doi.org/10.1038/nrn893>
- 677 Paxinos G, Huang XF, Petrides M, Toga AW (2009) The rhesus monkey brain in stereotaxic coordinates.

- 678 2nd ed. Academic Press, San Diego
- 679 Petrides M, Pandya DN (2007) Efferent association pathways from the rostral prefrontal cortex in the  
680 macaque monkey. *J Neurosci* 27 (43):11573-11586. [https://doi:10.1523/JNEUROSCI.2419-](https://doi:10.1523/JNEUROSCI.2419-07.2007)  
681 [07.2007](https://doi:10.1523/JNEUROSCI.2419-07.2007)
- 682 Petrides M, Pandya DN (2009) Distinct parietal and temporal pathways to the homologues of Broca's area  
683 in the monkey. *PLoS Biol* 7 (8):e1000170. <https://doi:10.1371/journal.pbio.1000170>
- 684 Remedios R, Logothetis NK, Kayser C (2009) An auditory region in the primate insular cortex responding  
685 preferentially to vocal communication sounds. *J Neurosci* 29 (4):1034-1045.  
686 <https://doi:10.1523/JNEUROSCI.4089-08.2009>
- 687 Reveley C, Gruslys A, Ye FQ, Glen D, Samaha J, B ER, Saad Z, A KS, Leopold DA, Saleem KS (2016)  
688 Three-Dimensional Digital Template Atlas of the Macaque Brain. *Cereb Cortex*.  
689 <https://doi:10.1093/cercor/bhw248>
- 690 Robinson EC, Jbabdi S, Glasser MF, Andersson J, Burgess GC, Harms MP, Smith SM, Van Essen DC,  
691 Jenkinson M (2014) MSM: a new flexible framework for Multimodal Surface Matching.  
692 *Neuroimage* 100:414-426. <https://doi:10.1016/j.neuroimage.2014.05.069>
- 693 Rolls ET (2019) Taste and smell processing in the brain. *Handb Clin Neurol* 164:97-118.  
694 <https://doi:10.1016/B978-0-444-63855-7.00007-1>
- 695 Royer J, Paquola C, Lariviere S, Vos de Wael R, Tavakol S, Lowe AJ, Benkarim O, Evans AC, Bzdok D,  
696 Smallwood J, Frauscher B, Bernhardt BC (2020) Myeloarchitecture gradients in the human insula:  
697 Histological underpinnings and association to intrinsic functional connectivity. *Neuroimage*  
698 216:116859. <https://doi:10.1016/j.neuroimage.2020.116859>
- 699 Saleem KS, Logothetis N (2007) A combined MRI and histology atlas of the rhesus monkey brain in  
700 stereotaxic coordinates. Academic, London ; Burlington, MA
- 701 Setogawa T, Mizuhiki T, Matsumoto N, Akizawa F, Kuboki R, Richmond BJ, Shidara M (2019) Neurons in  
702 the monkey orbitofrontal cortex mediate reward value computation and decision-making. *Commun*  
703 *Biol* 2:126. <https://doi:10.1038/s42003-019-0363-0>
- 704 Shen K, Bezgin G, Schirner M, Ritter P, Everling S, McIntosh AR (2019) A macaque connectome for large-  
705 scale network simulations in TheVirtualBrain. *Sci Data* 6 (1):123. [https://doi:10.1038/s41597-019-](https://doi:10.1038/s41597-019-0129-z)  
706 [0129-z](https://doi:10.1038/s41597-019-0129-z)
- 707 Smith SM (2002) Fast robust automated brain extraction. *Human Brain Mapping* 17 (3):143-155.  
708 <https://doi:10.1002/hbm.10062>
- 709 Smith SM, Jenkinson M, Woolrich MW, Beckmann CF, Behrens TE, Johansen-Berg H, Bannister PR, De  
710 Luca M, Drobnjak I, Flitney DE, Niazy RK, Saunders J, Vickers J, Zhang Y, De Stefano N, Brady  
711 JM, Matthews PM (2004) Advances in functional and structural MR image analysis and  
712 implementation as FSL. *Neuroimage* 23 Suppl 1:S208-219.  
713 <https://doi:10.1016/j.neuroimage.2004.07.051>
- 714 Tian Y, Zalesky A (2018) Characterizing the functional connectivity diversity of the insula cortex:  
715 Subregions, diversity curves and behavior. *Neuroimage* 183:716-733.  
716 <https://doi:10.1016/j.neuroimage.2018.08.055>
- 717 Tournier JD, Smith R, Raffelt D, Tabbara R, Dhollander T, Pietsch M, Christiaens D, Jeurissen B, Yeh CH,  
718 Connelly A (2019) MRtrix3: A fast, flexible and open software framework for medical image  
719 processing and visualisation. *Neuroimage* 202. <https://doi:10.1016/j.neuroimage.2019.116137>
- 720 Tustison NJ, Avants BB, Cook PA, Zheng Y, Egan A, Yushkevich PA, Gee JC (2010) N4ITK: improved N3  
721 bias correction. *IEEE Trans Med Imaging* 29 (6):1310-1320.



- 722 [https://doi:10.1109/TMI.2010.2046908](https://doi.org/10.1109/TMI.2010.2046908)
- 723 Van Essen DC (2002) Windows on the brain: the emerging role of atlases and databases in neuroscience.  
724 *Curr Opin Neurobiol* 12 (5):574-579. [https://doi:10.1016/s0959-4388\(02\)00361-6](https://doi.org/10.1016/s0959-4388(02)00361-6)
- 725 Veraart J, Novikov DS, Christiaens D, Ades-Aron B, Sijbers J, Fieremans E (2016) Denoising of diffusion  
726 MRI using random matrix theory. *Neuroimage* 142:384-396.  
727 [https://doi:10.1016/j.neuroimage.2016.08.016](https://doi.org/10.1016/j.neuroimage.2016.08.016)
- 728 Wallis CU, Cardinal RN, Alexander L, Roberts AC, Clarke HF (2017) Opposing roles of primate areas 25  
729 and 32 and their putative rodent homologs in the regulation of negative emotion. *P Natl Acad Sci*  
730 *USA* 114 (20):E4075-E4084. [https://doi:10.1073/pnas.1620115114](https://doi.org/10.1073/pnas.1620115114)
- 731 Woolrich MW, Jbabdi S, Patenaude B, Chappell M, Makni S, Behrens T, Beckmann C, Jenkinson M, Smith  
732 SM (2009) Bayesian analysis of neuroimaging data in FSL. *Neuroimage* 45 (1 Suppl):S173-186.  
733 [https://doi:10.1016/j.neuroimage.2008.10.055](https://doi.org/10.1016/j.neuroimage.2008.10.055)
- 734 Xia XL, Fan LZ, Cheng C, Eickhoff SB, Chen JJ, Li HF, Jiang TZ (2017) Multimodal connectivity-based  
735 parcellation reveals a shell-core dichotomy of the human nucleus accumbens. *Human Brain*  
736 *Mapping* 38 (8):3878-3898. [https://doi:10.1002/hbm.23636](https://doi.org/10.1002/hbm.23636)
- 737 Yang S, Meng Y, Li J, Li B, Fan YS, Chen H, Liao W (2020) The thalamic functional gradient and its  
738 relationship to structural basis and cognitive relevance. *Neuroimage* 218:116960.  
739 [https://doi:10.1016/j.neuroimage.2020.116960](https://doi.org/10.1016/j.neuroimage.2020.116960)
- 740 Yaxley S, Rolls ET, Sienkiewicz ZJ (1990) Gustatory responses of single neurons in the insula of the  
741 macaque monkey. *J Neurophysiol* 63 (4):689-700. [https://doi:10.1152/jn.1990.63.4.689](https://doi.org/10.1152/jn.1990.63.4.689)
- 742

743 **Figure legends**

744 **Figure 1.** Macaque insula gradients based on structural connectivity. (A) Ten insula gradients  
745 distribution and their variance explained. (B) The top two insula gradients mapped into Yerks19  
746 surface space. The gradients were normalized to the maximum value in the range of 0 to 1 for  
747 visualization.

748

749 **Figure 2.** Subdivisions of macaque insula. (A) Initial insula partition merged from the  
750 dominant and second gradient with top and bottom 25% portion. (B) Validation indices and  
751 subdivisions in 2 clusters for all four components. Cramer's V (CV) described consistency of  
752 parcellation across subjects, and topological distance (TpD) measured the symmetry of  
753 parcellations between hemispheres. Higher values of CV and TpD indicated good consistency  
754 and symmetry, respectively. (C) The final insula subdivision with 8 subregions.

755

756 **Figure 3.** The connectivity patterns of four components, including INS1 (A), INS2 (B), INS3  
757 (C), and INS4 (D). The connectivity profile was mapped into the F99 surface space ([Van Essen  
758 2002](#)) for visualization using Caret5 and focused on the ipsilateral hemisphere.

759

760 **Figure 4.** Connectivity patterns of each two subregions subdivided from four components INS1  
761 (A), INS2 (B), INS3 (C), and INS4 (D). Connectivity profiles focused on the ipsilateral  
762 hemisphere for one subregion. Permutation tests (histograms) were used to identify differences  
763 between connectivity fingerprints of two subregions. The observations, the Manhattan distance  
764 between two fingerprints, was higher than the criterion of permutations, indicating significant  
765 differences between the connectivity fingerprints of two subregions.

766

767 **Figure 5.** Insula gradients captured insula microstructure and morphology. (A) Insula gradients  
768 revealed the significant correlations with T1w/T2w map. (B) Insula gradients were associated  
769 with cortical thickness.

770

771 **Figure 6.** Comparison between macaque insula topographic organization in our study and the  
772 prior insula histological architecture. (A) Insula topographic organization. From top to bottom,  
773 macaque insula was obtained by structural connectivity gradients, 25% components extraction,

774 and connectivity-based subdivisions of all components sequentially. (B) Macaque insula  
775 cytoarchitecture gradients were obtained from Gallay et al.'s study ([Gallay et al. 2012b](#)). (C)  
776 The insula cytoarchitecture of Paxinos et al.'s ([Paxinos et al. 2009](#)) and Calabrese et al.'s  
777 ([Calabrese et al. 2015b](#)) macaque atlas was mapped to the F99 surface space. (D) Macaque  
778 insula cytoarchitecture was obtained from Evrard et al.'s study ([Evrard et al. 2014](#))

779 **Figure 1**

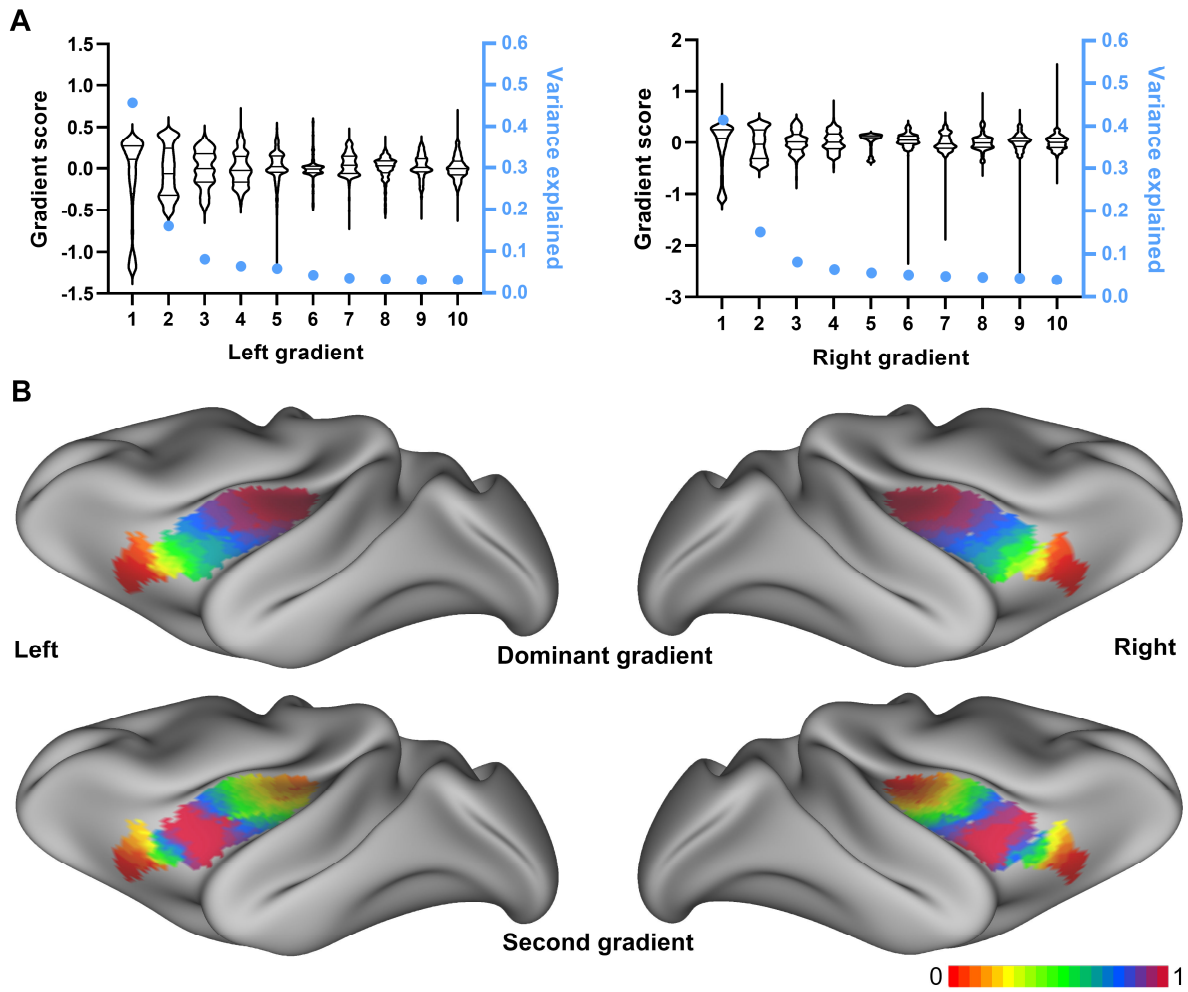

780

781 **Figure 2**

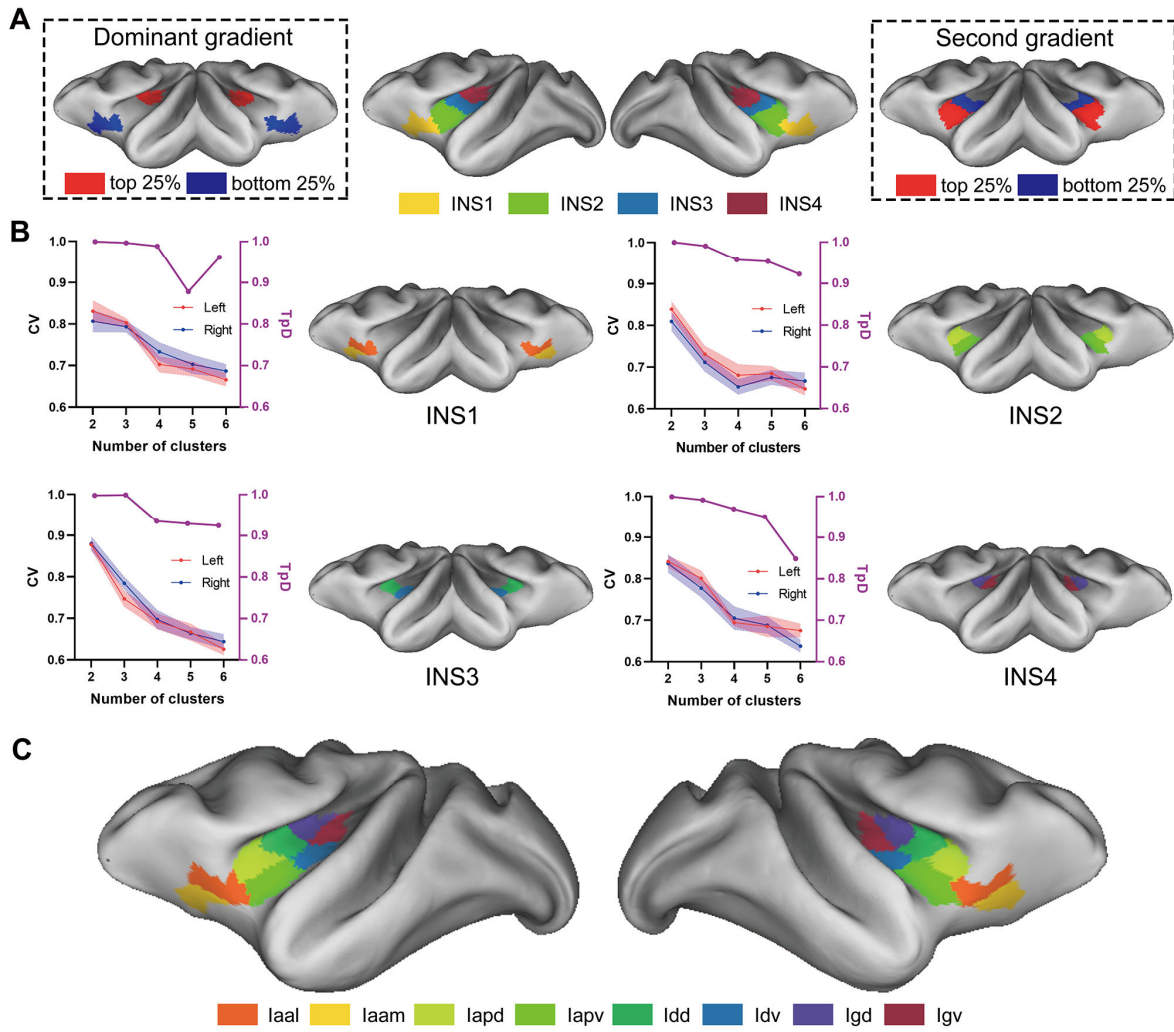

782

783 **Figure 3**

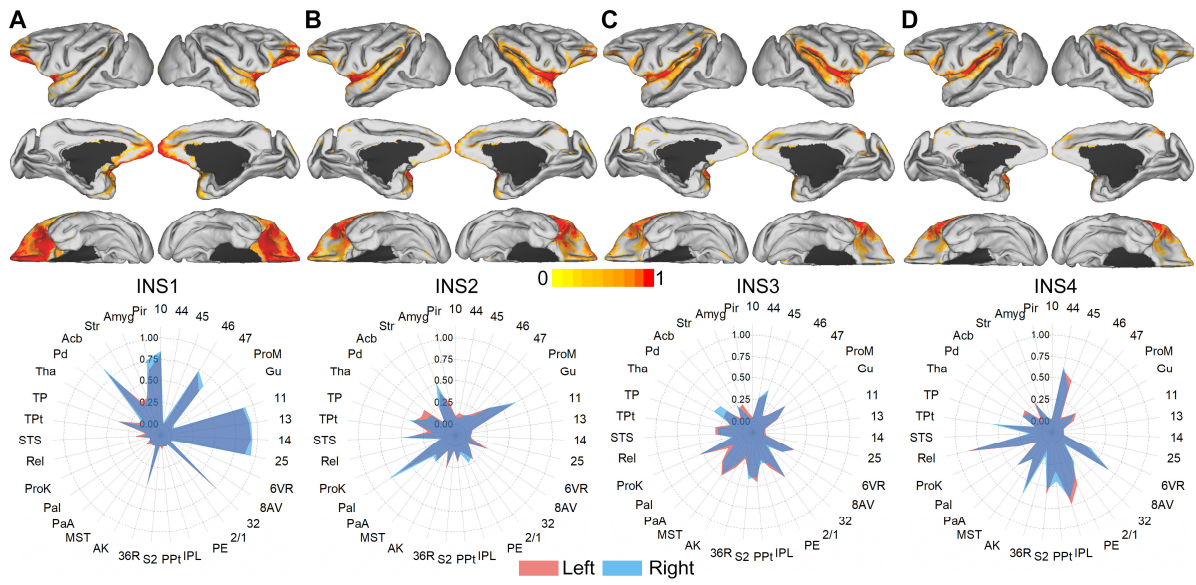

784



785 **Figure 4**

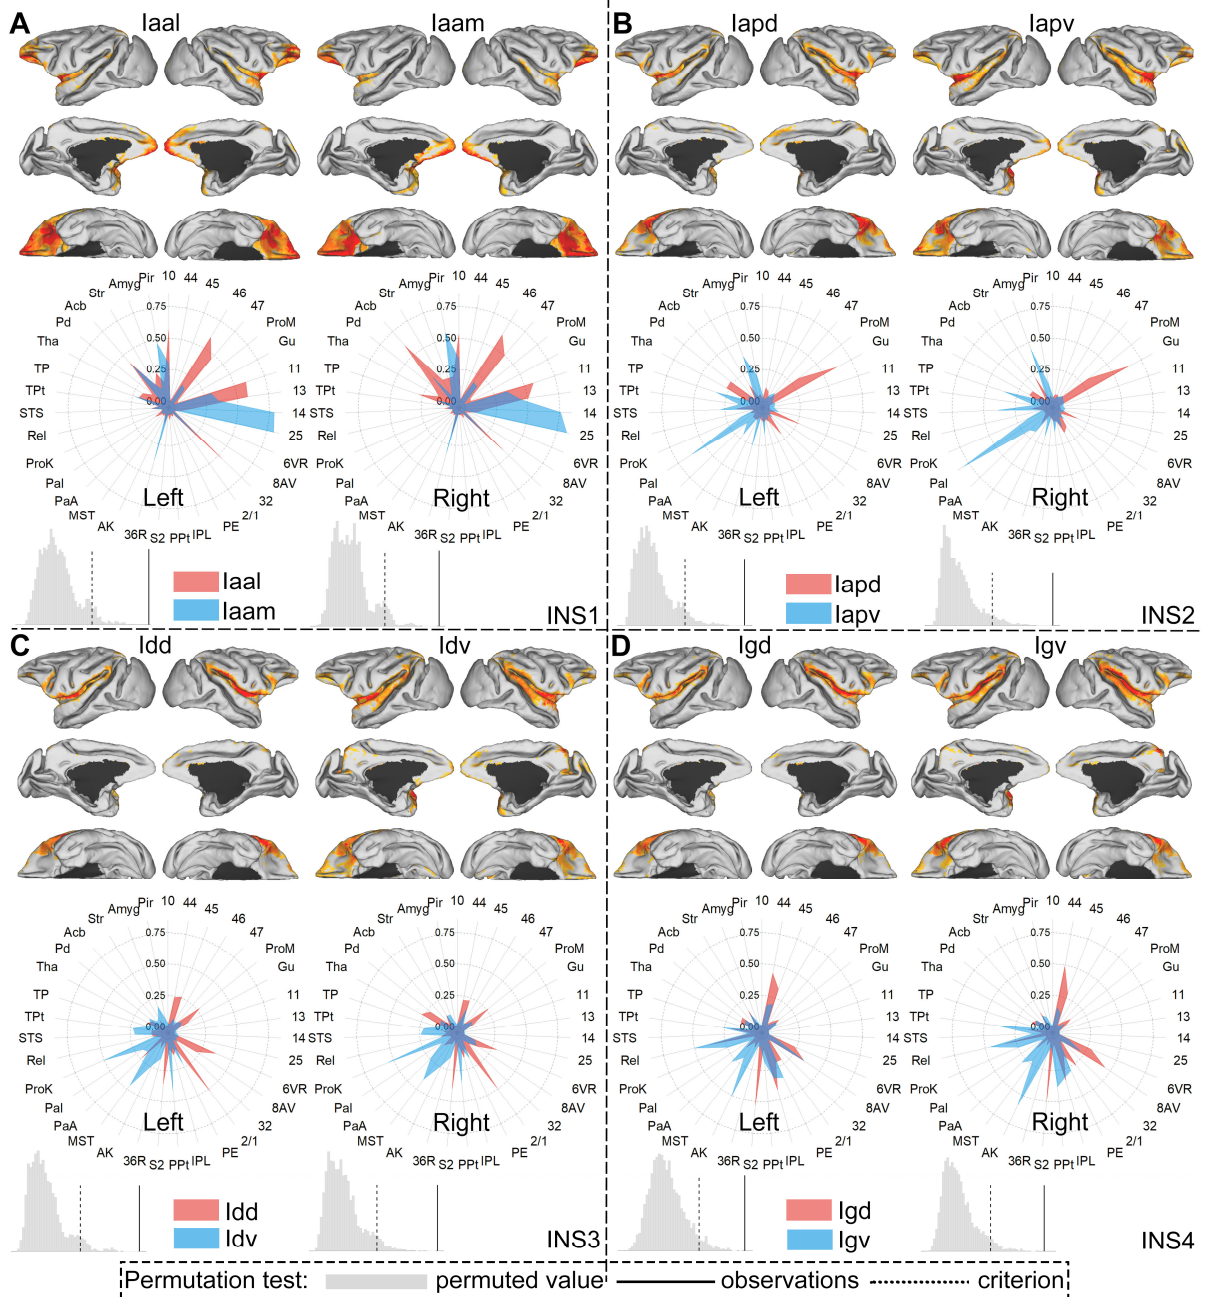

786

787 **Figure 5**

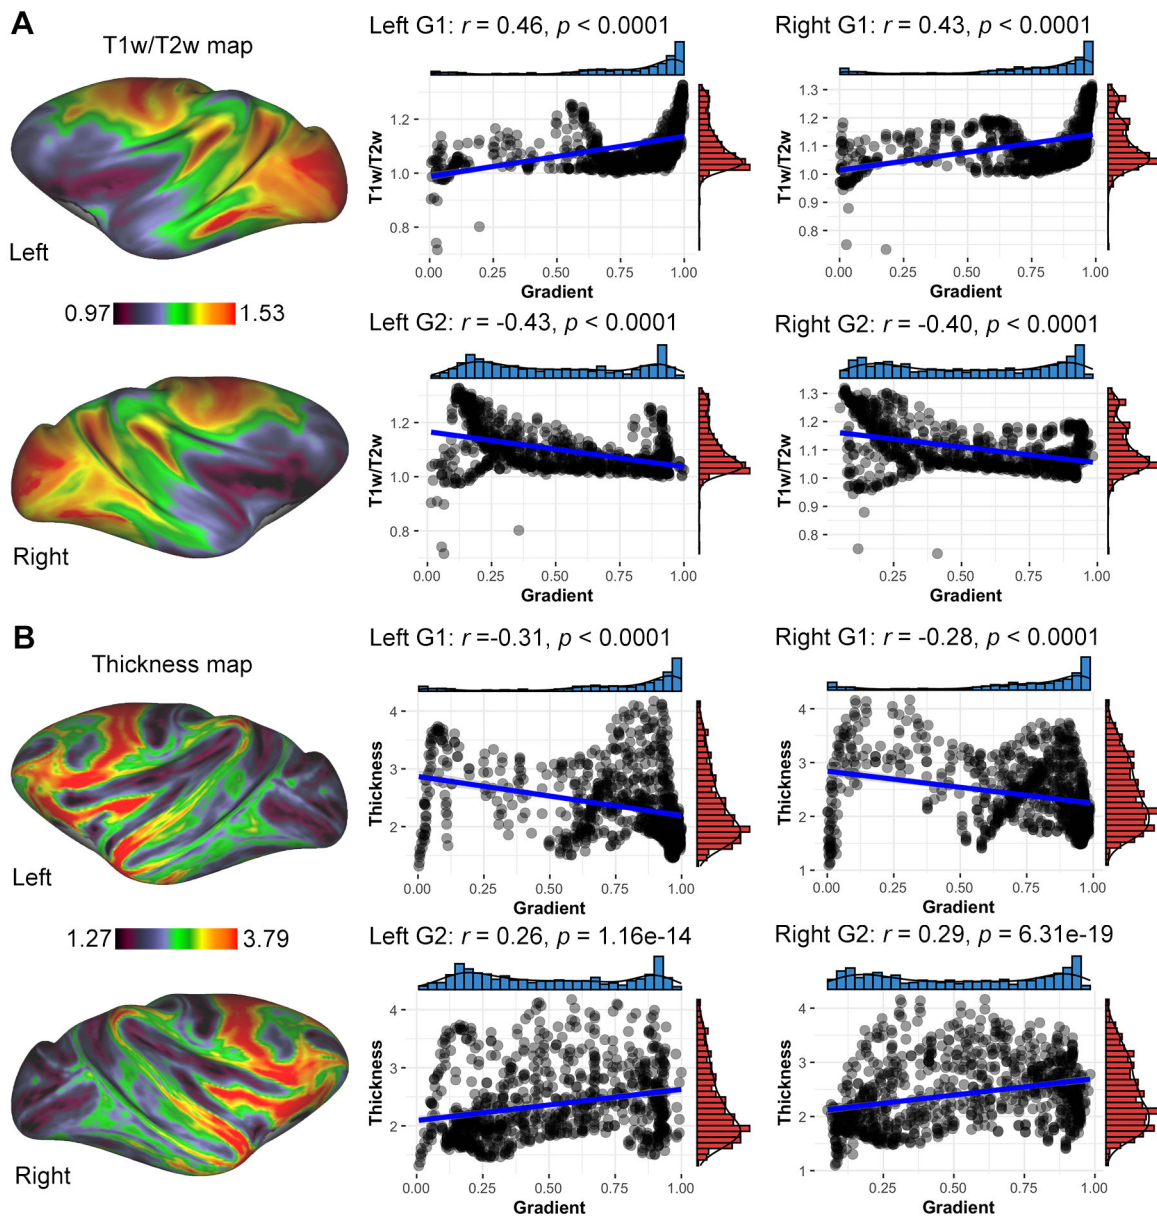

788
